# Supplementary material
Source: PubMed Central journal article supplement (PMC6173981)
Supplement: NIHMS1503195-supplement-2.pdf [file NIHMS1503195-supplement-2.pdf]

## **SUPPLEMENTARY INFORMATION:**

### **Alternative Splicing of Core Hippo Signaling Components Supports Hepatocyte Proliferation During Liver Regeneration**

Sushant Bangru<sup>1\*</sup>, Waqar Arif<sup>1\*</sup>, Joseph Seimetz<sup>1</sup>, Amruta Bhate<sup>1</sup>, Jackie Chen<sup>1</sup>, Edrees H. Rahan<sup>1</sup>, Russ P. Carstens<sup>2</sup>, Sayeepriyadarshini Anakk<sup>3</sup>, and Auinash Kalsotra<sup>1,4,§</sup>

Departments of <sup>1</sup>Biochemistry and <sup>3</sup>Molecular Integrative Physiology, <sup>4</sup>Carl R. Woese Institute of Genomic Biology, University of Illinois Urbana-Champaign, IL USA. <sup>2</sup>Departments of Medicine and Genetics, Perelman School of Medicine, University of Pennsylvania, Philadelphia, PA, USA.

\*These authors contributed equally to the work.

#### **Supplementary Tables:**

**Supplementary Table 1. Information for RNA sequencing experiments including mapping rates for individual files.** This supplemental table is related to Figure 1, 2.

**Supplementary Table 2. Information for antibodies used in relevant Western blot and Immunofluorescence experiments.** This supplemental table is related to Figure 1, 3, 5.

**Supplementary Table 3. Primer and oligonucleotides sequences used in relevant qRT-PCR and cell culture experiments.** This supplemental table is related to Figure 1, 6, 7.

**Supplementary Table 1: Information for RNA sequencing experiments with mapping rates for individual files.**

| <b>Sample Name</b>               | <b>Read Length</b> | <b>Total Reads</b> | <b>Mapping percentage</b> |
|----------------------------------|--------------------|--------------------|---------------------------|
| Adult Chow Replicate I           | 2x100              | 86,376,423         | 74.57                     |
| Adult Chow Replicate II          | 2x100              | 95,808,963         | 67.43                     |
| Adult DDC Replicate I            | 2x100              | 97,970,086         | 87.56                     |
| Adult DDC Replicate II           | 2x100              | 96,803,084         | 86.75                     |
| Embryonic Day 18 Replicate I     | 2x100              | 94,719,035         | 91.83                     |
| Embryonic Day 18 Replicate II    | 2x100              | 92,548,892         | 90.67                     |
| Chow Cytoplasmic Replicate I     | 2x100              | 54,872,219         | 81.98                     |
| Chow Cytoplasmic Replicate II    | 2x100              | 44,390,343         | 77.31                     |
| Chow Monosome Replicate I        | 2x100              | 39,213,717         | 75.75                     |
| Chow Monosome Replicate II       | 2x100              | 29,429,787         | 71.95                     |
| Chow Light polysome Replicate I  | 2x100              | 44,883,816         | 83.57                     |
| Chow Light polysome Replicate II | 2x100              | 43,847,798         | 72.54                     |
| Chow Heavy polysome Replicate I  | 2x100              | 35,857,750         | 85.37                     |
| Chow Heavy polysome Replicate II | 2x100              | 31,741,745         | 72.88                     |
| DDC Cytoplasmic Replicate I      | 2x100              | 48,518,552         | 89.62                     |
| DDC Cytoplasmic Replicate II     | 2x100              | 59,952,761         | 87.51                     |
| DDC Monosome Replicate I         | 2x100              | 30,759,613         | 85.03                     |
| DDC Monosome Replicate II        | 2x100              | 44,190,000         | 82.16                     |
| DDC Light polysome Replicate I   | 2x100              | 41,811,194         | 91.48                     |
| DDC Light polysome Replicate II  | 2x100              | 56,498,851         | 92.87                     |
| DDC Heavy polysome Replicate I   | 2x100              | 34,155,864         | 85.27                     |
| DDC Heavy polysome Replicate II  | 2x100              | 45,733,622         | 91.10                     |

**Supplementary Table 2: Information for antibodies used in Western blot and Immunofluorescence experiments.**

| Target                              | Type           | Assay | Origin | Dilution | Source               | Catalogue No. |
|-------------------------------------|----------------|-------|--------|----------|----------------------|---------------|
| Hnf4a                               | 1 <sup>0</sup> | IF    | Mouse  | 1:500    | Abcam                | ab41898       |
| Hnf4a                               | 1 <sup>0</sup> | IF    | Rabbit | 1:500    | Cell Signaling Tech. | 3113          |
| Esrp2                               | 1 <sup>0</sup> | WB    | Mouse  | 1:5000   | Rockland             | 210-301-C31   |
| hnRNP H                             | 1 <sup>0</sup> | WB    | Rabbit | 1:10000  | Abcam                | ab10374       |
| hnRNP C <sub>1</sub> C <sub>2</sub> | 1 <sup>0</sup> | WB    | Mouse  | 1:2000   | Abcam                | ab10294       |
| hnRNP L                             | 1 <sup>0</sup> | WB    | Mouse  | 1:2000   | Abcam                | ab6106        |
| Celf1 (CUGBP1)                      | 1 <sup>0</sup> | WB    | Mouse  | 1:1000   | Santa Cruz Biotech.  | sc-20003      |
| Mbnl1                               | 1 <sup>0</sup> | WB    | Mouse  | 1:1000   | EMD Millipore        | 04-048        |
| Ptbp1                               | 1 <sup>0</sup> | WB    | Mouse  | 1:1000   | Invitrogen           | 32-4800       |
| hnRNP A1                            | 1 <sup>0</sup> | WB    | Mouse  | 1:5000   | EMD Millipore        | 04-1469       |
| Srsf1                               | 1 <sup>0</sup> | WB    | Mouse  | 1:1000   | Thermo Fisher        | 32-4600       |
| Tbp                                 | 1 <sup>0</sup> | WB    | Mouse  | 1:5000   | Thermo Fisher        | MA5-14739     |
| Flag                                | 1 <sup>0</sup> | WB    | Mouse  | 1:10000  | Sigma Aldrich        | A8592         |
| Krt19                               | 1 <sup>0</sup> | IF    | Rabbit | 1:250    | Abcam                | 602-670       |
| pHistone-3                          | 1 <sup>0</sup> | IF    | Rabbit | 1:250    | EMD Millipore        | 06-570        |
| Yap1                                | 1 <sup>0</sup> | WB    | Mouse  | 1:500    | Santa Cruz Biotech.  | sc-101199     |
| pYap1 (S127)                        | 1 <sup>0</sup> | WB    | Rabbit | 1:1000   | Cell Signaling Tech. | 13008S        |
| Lats1                               | 1 <sup>0</sup> | WB    | Rabbit | 1:1000   | Cell Signaling Tech. | 3477S         |
| pLats1 (S909)                       | 1 <sup>0</sup> | WB    | Rabbit | 1:500    | Cell Signaling Tech. | 9157S         |
| Mst1                                | 1 <sup>0</sup> | WB    | Rabbit | 1:500    | Cell Signaling Tech. | 3682S         |
| pMst1/2<br>(T183/T180)              | 1 <sup>0</sup> | WB    | Rabbit | 1:1000   | Cell Signaling Tech. | 3681          |
| Anti-Mouse 488                      | 2 <sup>0</sup> | IF    | Goat   | 1:500    | Thermo Fisher        | 35503         |
| Anti-Mouse 594                      | 2 <sup>0</sup> | IF    | Goat   | 1:500    | Thermo Fisher        | 35511         |
| Anti-Rabbit 488                     | 2 <sup>0</sup> | IF    | Goat   | 1:500    | Thermo Fisher        | 35553         |
| Anti-Rabbit 594                     | 2 <sup>0</sup> | IF    | Goat   | 1:500    | Thermo Fisher        | 35561         |
| Anti-Mouse IgG                      | 2 <sup>0</sup> | WB    | Goat   | 1:5000   | Bio-Rad              | 1721011       |
| Anti-Rabbit IgG                     | 2 <sup>0</sup> | WB    | Goat   | 1:5000   | Thermo Fisher        | SA5-10033     |
| TEF1                                | 1 <sup>0</sup> | ChIP  | Mouse  | -        | Santa Cruz Biotech.  | sc-376113X    |
| Mouse IgG                           | 1 <sup>0</sup> | ChIP  | Mouse  | -        | Thermo Fisher        | 31903         |

**Supplementary Table 3: Primer and oligonucleotides sequences used in qRT-PCR and cell culture experiments.**

| Target              | Type   | Primer sense | Sequence (5' -> 3')      |
|---------------------|--------|--------------|--------------------------|
| Vim                 | qPCR   | F            | ATGCTTCTCTGGCACGTCTT     |
| Vim                 | qPCR   | R            | AGCCACGCTTTCATACTGCT     |
| Gfap                | qPCR   | F            | CGAAGAAAACCGCATCACCA     |
| Gfap                | qPCR   | R            | GGTGAGCCTGTATTGGGACA     |
| F4/80               | qPCR   | F            | TATCCTGGGGAGAGCCAAGT     |
| F4/80               | qPCR   | R            | GCTGTAGCTTCCCACAGAGT     |
| vWF                 | qPCR   | F            | ACCCTCTGCACAGAAAAGCC     |
| vWF                 | qPCR   | R            | CAGGAGATAACTGCAGCCCC     |
| Tdo                 | qPCR   | F            | TTTACAGGGAGGAGCCTCGA     |
| Tdo                 | qPCR   | R            | CTTGGTGCCCAGCATTCTGT     |
| Hnf4 $\alpha$       | qPCR   | F            | GGTCAAGCTACGAGGACAGC     |
| Hnf4 $\alpha$       | qPCR   | R            | CAATCTTCTTTGCCCGAATG     |
| <i>Arhgef10l_15</i> | RT-PCR | F            | CTGCTCAATGACATGCTGGT     |
| <i>Arhgef10l_15</i> | RT-PCR | R            | TCCTGACCCACCTCTACCAC     |
| <i>Lsm14b_78</i>    | RT-PCR | F            | AGAAACTGTTGCCAGCAAG      |
| <i>Lsm14b_78</i>    | RT-PCR | R            | GGTTTTGTCCTCTGGAACGA     |
| <i>Nf2_45</i>       | RT-PCR | F            | ACACAGCGAGAGCTCAGACA     |
| <i>Nf2_45</i>       | RT-PCR | R            | ACAAGCCAGCCCTCTACTGA     |
| <i>Tead1_12</i>     | RT-PCR | F            | TCACATTCAGGTTCTTGCCAGAAG |
| <i>Tead1_12</i>     | RT-PCR | R            | CGATCTGGGCTGATGACATGGCAG |
| <i>Csnk1d_63</i>    | RT-PCR | F            | GGAACGAGAACGGAAAGTGA     |
| <i>Csnk1d_63</i>    | RT-PCR | R            | GGGGGCGTGTCACTAGTAAAG    |
| <i>Yap1_48</i>      | RT-PCR | F            | AACCAGCAGCAGCAAATACA     |
| <i>Yap1_48</i>      | RT-PCR | R            | CCTGAGACATCCCAGGAGAA     |
| <i>Flnb_72</i>      | RT-PCR | F            | GGCGAGGAGGTGGGCTTTGTAG   |
| <i>Flnb_72</i>      | RT-PCR | R            | CCTGACGGCAAATGGAATCACCAA |
| <i>Sgsm1_165</i>    | RT-PCR | F            | AGACAAGGAGGACGACGAAG     |
| <i>Sgsm1_165</i>    | RT-PCR | R            | TGTGAACAGGAAGAGCAGGA     |
| <i>Dgkd_131</i>     | RT-PCR | F            | CTAAACGCAGCCGTAGTGGT     |
| <i>Dgkd_131</i>     | RT-PCR | R            | TTCATATGGCCCACTTTGGT     |
| <i>Epb4.1_63</i>    | RT-PCR | F            | CAGCCATTGCTCAGAGTCAG     |
| <i>Epb4.1_63</i>    | RT-PCR | R            | GGCATGGTGCTTTTTGATCT     |
| <i>Slk_93</i>       | RT-PCR | F            | AAGGAGCTGTCCAAGTTCCA     |
| <i>Slk_93</i>       | RT-PCR | R            | TATTGGCCAACTCTGCCTTC     |
| <i>Kras_124</i>     | RT-PCR | F            | GATGTGCCTATGGTCCTGGT     |
| <i>Kras_124</i>     | RT-PCR | R            | TCTTCTTCCATCTTTGCTCA     |
| <i>Sorbs1_168</i>   | RT-PCR | F            | TCAGAGTCACCAAGACATTTTAT  |
| <i>Sorbs1_168</i>   | RT-PCR | R            | ATTTGGCTCGAGCAGGTCT      |
| <i>Cpsf4_1455</i>   | RT-PCR | F            | CCGGAGAGTCATTTGTGTGA     |
| <i>Cpsf4_1455</i>   | RT-PCR | R            | CCTGCACTGCTGTTTTGACT     |

|                    |           |   |                           |
|--------------------|-----------|---|---------------------------|
| H2afy_9            | RT-PCR    | F | AAGTGAGCAAGGCGGCCAG       |
| H2afy_9            | RT-PCR    | R | AGCTACCTCCAAGGGCCCGTT     |
| Gpr137_226         | RT-PCR    | F | TAGGAGGGCAATCTCAATGG      |
| Gpr137_226         | RT-PCR    | R | AGCTGCCAGGTTGTAACAGG      |
| Idua_88            | RT-PCR    | F | GTGTCCATGACCACACAAGG      |
| Idua_88            | RT-PCR    | R | AAGGAATCCCCAGGACCA        |
| Gtf2a2_149         | RT-PCR    | F | TTCAGCATTGGCTCAGAGAG      |
| Gtf2a2_149         | RT-PCR    | R | TCAGGCCTTTGAAATCTCAGT     |
| Neb_114            | RT-PCR    | F | GGAAAGACCTGGAAGAAAGCA     |
| Neb_114            | RT-PCR    | R | GCAATGTCCGGTAGCATTCT      |
| Myo18a_21          | RT-PCR    | F | TCCTGGCTTCCATCTACCAC      |
| Myo18a_21          | RT-PCR    | R | TGAAGATAGCCGAGGACAGC      |
| Jmjd1c_125         | RT-PCR    | F | CTGGGTGAAGGAACAGAAGG      |
| Jmjd1c_125         | RT-PCR    | R | GAAGGATCGACATTCTGTGGT     |
| Mprip_66           | RT-PCR    | F | GTGTTACCCGGCAACTCAGA      |
| Mprip_66           | RT-PCR    | R | GGAATTGACAGGGAGGGACT      |
| Idua_186           | RT-PCR    | F | CCAGACCACCATGACTTTGA      |
| Idua_186           | RT-PCR    | R | CTCCACAACCTGCCATCTCCT     |
| Mtss_12            | RT-PCR    | F | GCTGCAGAAGAAGGCCAAAA      |
| Mtss_12            | RT-PCR    | R | TTCTCCGTTTCTCCAACAG       |
| Bag6_108           | RT-PCR    | F | CCTGGTGGTGTGCCAAGT        |
| Bag6_108           | RT-PCR    | R | GAGTTGGTGTCTGTTGGGAAG     |
| Casp3              | qPCR      | F | TCTGACTGAAAGCCGAAAC       |
| Casp3              | qPCR      | R | ATCTTCTGGCAAGCCATCTC      |
| Ankrd1             | qPCR      | F | GTCATTACGAGTGCGCTGAG      |
| Ankrd1             | qPCR      | R | ATAGCGGTTTCAGCCTCACAG     |
| Cyr61              | qPCR      | F | GGAAAAGGCAGCTCACTGAA      |
| Cyr61              | qPCR      | R | TCTGAACGATGCATTTCTGG      |
| Ctgf               | qPCR      | F | CTGCCTACCGACTGGAAGAC      |
| Ctgf               | qPCR      | R | TAGAACAGGCGCTCCACTCT      |
| Inhba              | qPCR      | F | ATCATCACCTTTGCCGAGTC      |
| Inhba              | qPCR      | R | CACTTCTGCACGCTCCACTA      |
| Ccne1              | qPCR      | F | CACTTCCCGTCTTGAATTGG      |
| Ccne1              | qPCR      | R | AGGATGACGCTGCAGAAAGT      |
| Birc5              | qPCR      | F | CTGATTTGGCCCAGTGTTTT      |
| Birc5              | qPCR      | R | CAGGGGAGTGCTTTTCTATGC     |
| Ccnd1              | qPCR      | F | TCCTCTCCAAAATGCCAGAG      |
| Ccnd1              | qPCR      | R | AGGGTGGGTTGGAAATGAAC      |
| Std. Control Oligo | ASO       | - | CCTCTTACCTCAGTTACAATTTATA |
| Nf2_45             | ASO       | - | GGGCTTGAGGCTAAATGAGCAAAAT |
| Tead1_12           | ASO       | - | AGAGAACATACTTACCATGCTTGTT |
| Csnk1d_63          | ASO       | - | ACCACGAGCACACTCACCCAGTG   |
| Yap1_48            | ASO       | - | ACATCATATAAGAGCCTACCTGACA |
| Birc5_Pro_Tead1    | ChIP-qPCR | F | AACAGTCACACCCAGGAAGC      |
| Birc5_Pro_Tead1    | ChIP-qPCR | R | CAGCGCTGGAAAAGAAAGTC      |

|                 |           |   |                      |
|-----------------|-----------|---|----------------------|
| Hnf4a_Pro_Tead1 | ChIP-qPCR | F | GGGTGTTTTACCTGCGTGTT |
| Hnf4a_Pro_Tead1 | ChIP-qPCR | R | TGGTAGCTCACAGCCATCTG |
